# Supplementary material for: Determinants of good metabolic control without weight gain in type 2 diabetes management: a machine learning analysis
Source: PubMed Central journal article supplement — BMJ Open Diabetes Res Care. 2020 Sep 14;8(1):e001362. doi: 10.1136/bmjdrc-2020-001362 (PMC7490948; doi:10.1136/bmjdrc-2020-001362), 2020-09-14
Supplement: bmjdrc-2020-001362supp002.pdf [file bmjdrc-2020-001362supp002.pdf]

Figure 2\_THERAPY - DRUG CLASSES

| THERAPY                        | DRUG CLASSES IN ATC CODES                                                                                                                               |
|--------------------------------|---------------------------------------------------------------------------------------------------------------------------------------------------------|
| <b>Metformin</b>               | A10BA o A10BA02                                                                                                                                         |
| <b>Secretagogues</b>           | A10BB o A10BB01 o A10BB07 o A10BB08 o A10BB09 o A10BB12 o A10BD o A10BD01 o A10BD02 o A10BD03 o A10BD04 o A10BD05 o A10BD06 o A10BD09 o A10BX o A10BX02 |
| <b>Insulin</b>                 | A10A*                                                                                                                                                   |
| <b>DPP-4 inhibitors</b>        | A10BH* o A10BD07 o A10BD08 o A10BD10 o A10BD11 o A10BD13                                                                                                |
| <b>GLP-1 receptor agonists</b> | A10BX04 o A10BX07 o A10BX10 o A10BX14                                                                                                                   |
| <b>SGLT2 inhibitors</b>        | A10BX09 o A10BX11 o A10BX12 o A10BD15 o A10BD16 o A10BD20                                                                                               |
| <b>Glitazones</b>              | A10BG*                                                                                                                                                  |
| <b>Acarbose</b>                | A10BF o A10BF01                                                                                                                                         |

\* Any combinationn of values
