# Supplementary figures and images for: Determinants of good metabolic control without weight gain in type 2 diabetes management: a machine learning analysis
Source: PubMed Central journal article supplement — BMJ Open Diabetes Res Care. 2020 Sep 14;8(1):e001362. doi: 10.1136/bmjdrc-2020-001362 (PMC7490948; doi:10.1136/bmjdrc-2020-001362), 2020-09-14

## FIG.1 DATA FLOW CHART

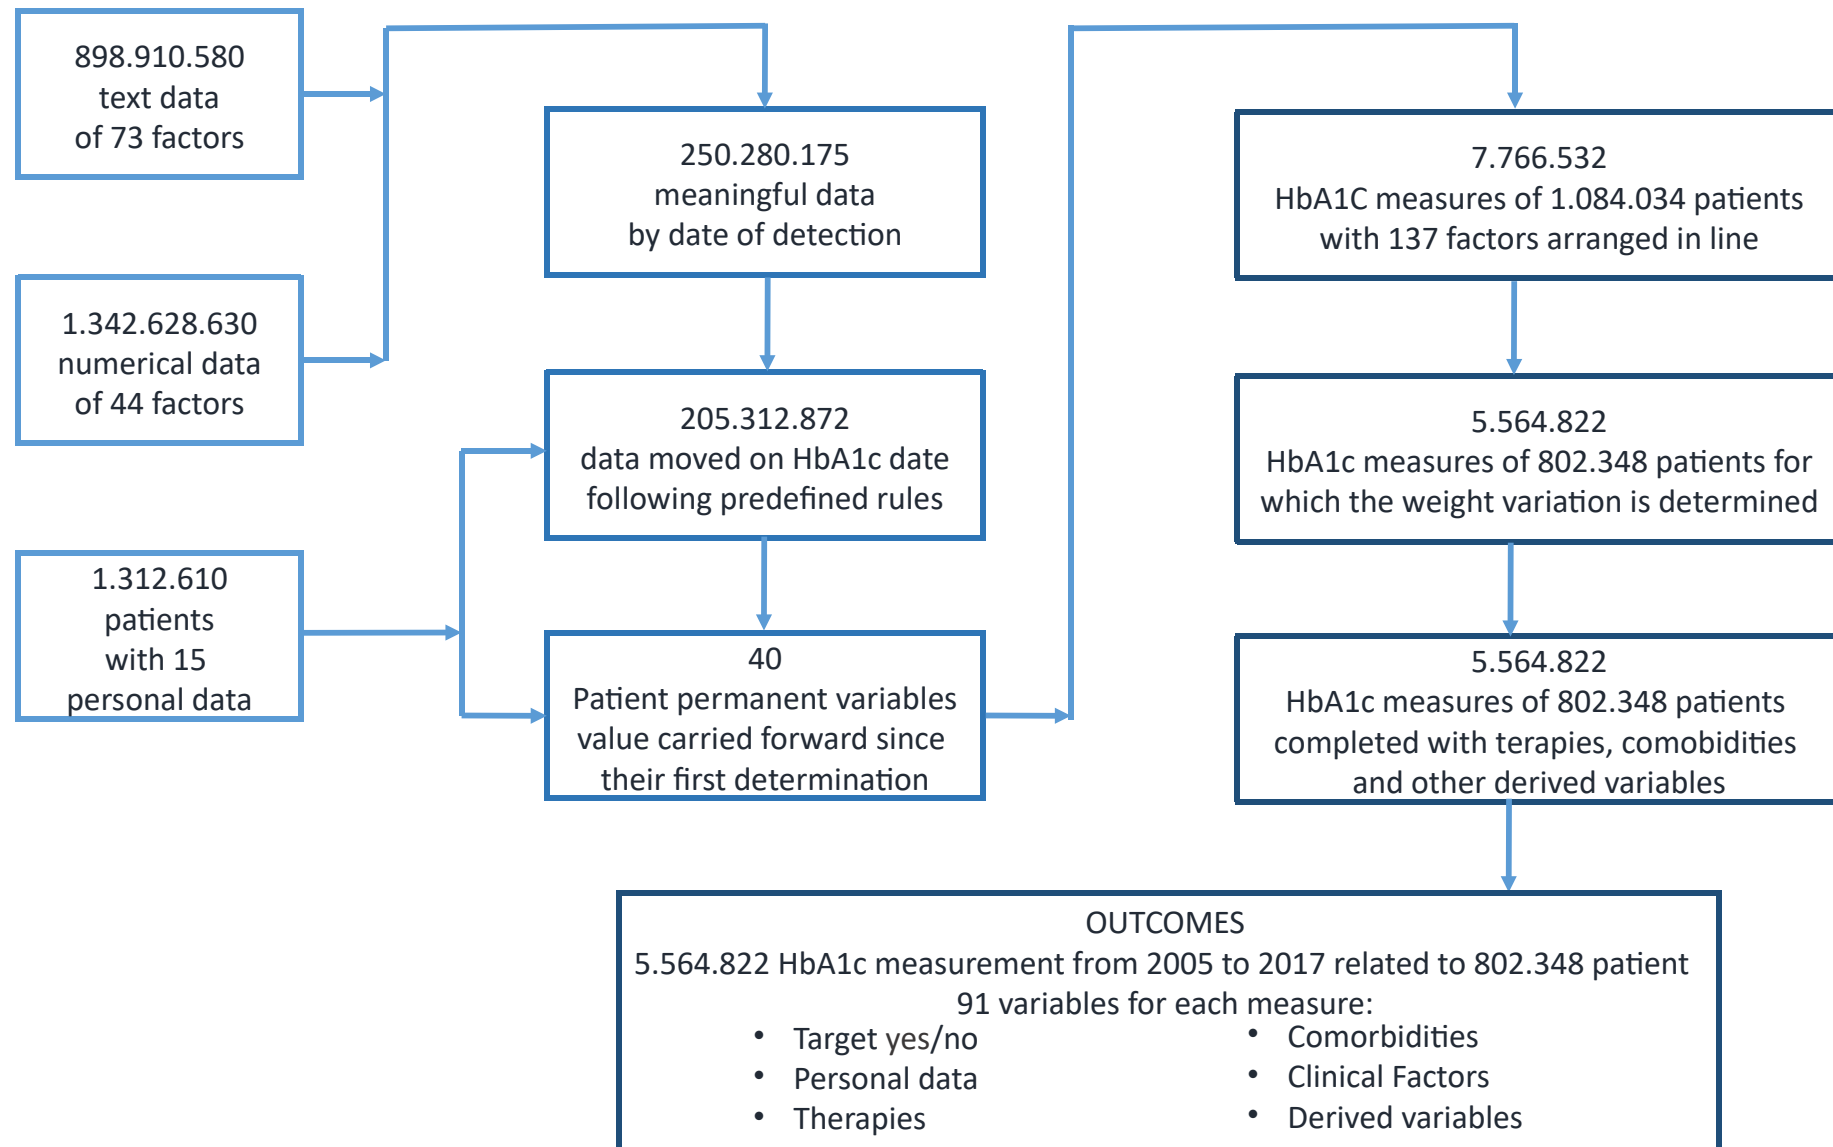

Supplement: bmjdrc-2020-001362supp001.pdf [file bmjdrc-2020-001362supp001.pdf]

## FIGURE 3. VARIABLES SELECTED BY LLM

(Relevance on X axis)

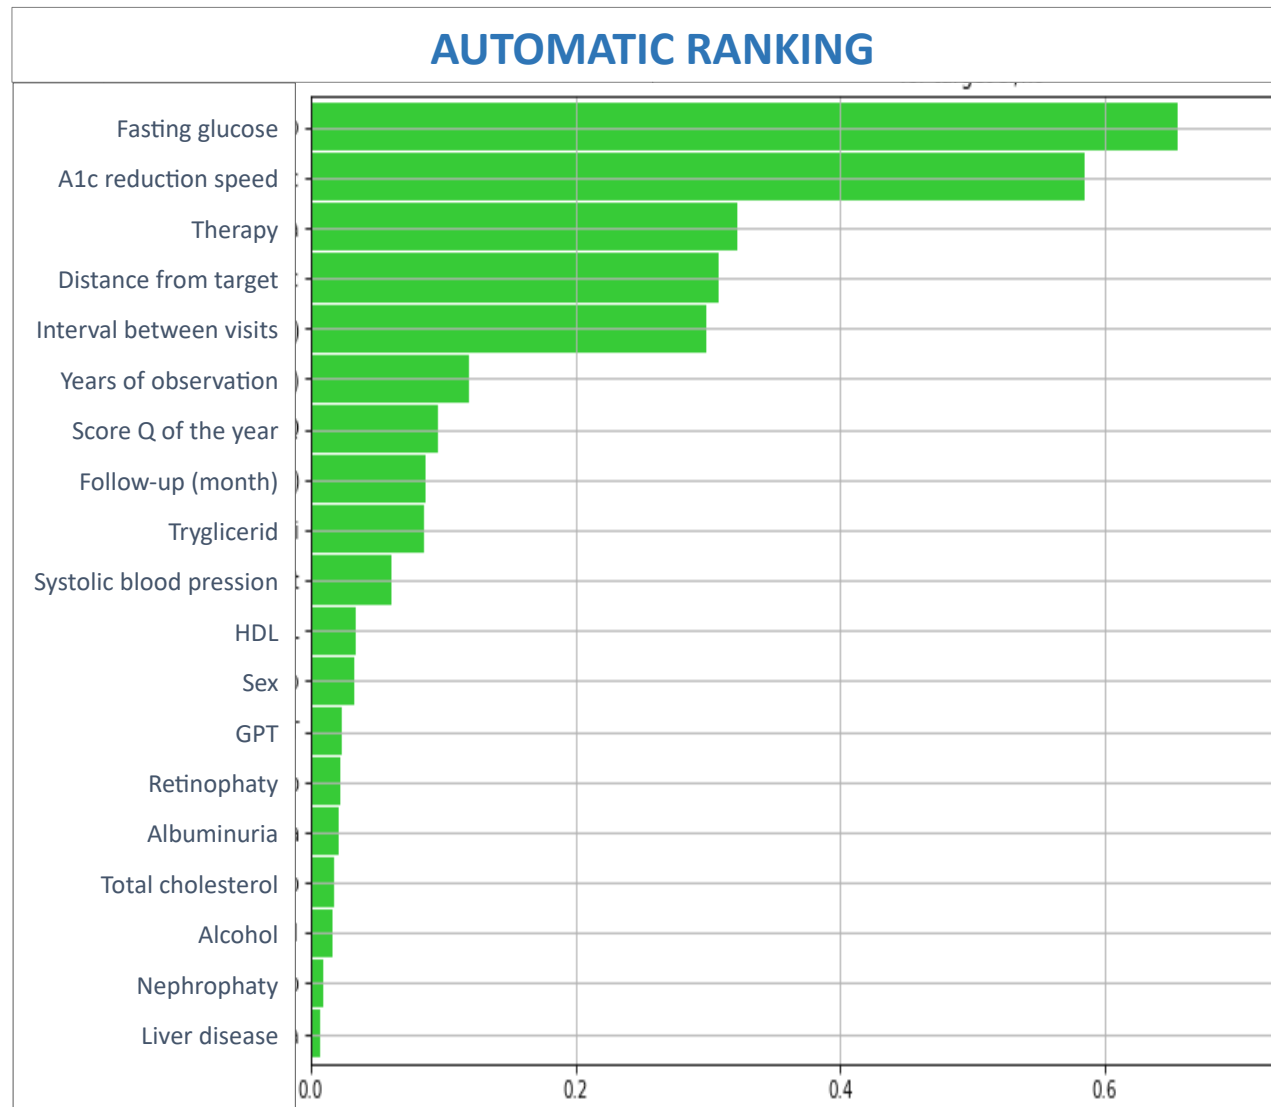

Supplement: bmjdrc-2020-001362supp003.pdf [file bmjdrc-2020-001362supp003.pdf]
